# Supplementary material for: Impaired Neutralizing Antibody Activity against B.1.617.2 (Delta) after Anti-SARS-CoV-2 Vaccination in Patients Receiving Anti-CD20 Therapy
Source: MDPI journal article supplement (doi:10.3390/jcm11061739), 2022-03-21

Supplemental Figure S1. Side effect questionnaire

1. Side effects after 1st vaccination:

☐ yes ☐ no

2. If yes, please mark the appropriate side effects, you had:

☐ local events (such as pain at injection site, redness, swelling)

☐ fever ☐ fatigue ☐ headache ☐ chills

☐ vomiting ☐ diarrhea ☐ muscle pain ☐ joint pain

☐ swollen lymph nodes ☐ others, such as \_\_\_\_\_

3. In response to above mentioned side-effects, I took the following medication

☐ \_\_\_\_\_

1. Side effects after 2nd vaccination:

☐ yes ☐ no

2. If yes, please mark the appropriate side effects, you had:

☐ local events (such as pain at injection site, redness, swelling)

☐ fever ☐ fatigue ☐ headache ☐ chills

☐ vomiting ☐ diarrhea ☐ muscle pain ☐ joint pain

☐ swollen lymph nodes ☐ others, such as \_\_\_\_\_

3. In response to above mentioned side-effects, I took the following medication

☐ \_\_\_\_\_

**Supplemental Figure S2.** Cutoff values for defining positivity for antibodies against different SARS-CoV-2 and common cold coronaviruses target epitopes by a bead-based multiplex assay.

| <b>Target</b>                   | <b>Cutoff (MFI)</b> |
|---------------------------------|---------------------|
| SARS-CoV-2 Spike                | 6800                |
| SARS-CoV-2 Spike S1             | 2700                |
| SARS-CoV-2 Spike RBD            | 3800                |
| SARS-CoV-2 Spike S2             | 3200                |
| SARS-CoV-2 Nucleocapsid Protein | 5900                |
| HCoV-229E Spike S1              | 8012                |
| HCoV-HKU1 Spike S1              | 4235                |
| HCoV-NL63 Spike S1              | 4407                |
| HCoV-OC43 Spike S1              | 3599                |
| SARS-CoV Spike S1               | 41                  |

MFI, mean fluorescence intensity; RBD, receptor-binding domain

**Supplemental Figure S3.** Radial Graphs of adverse reaction after first and second anti-SARS-CoV-2 vaccination of Rituximab treated patients and healthy controls.

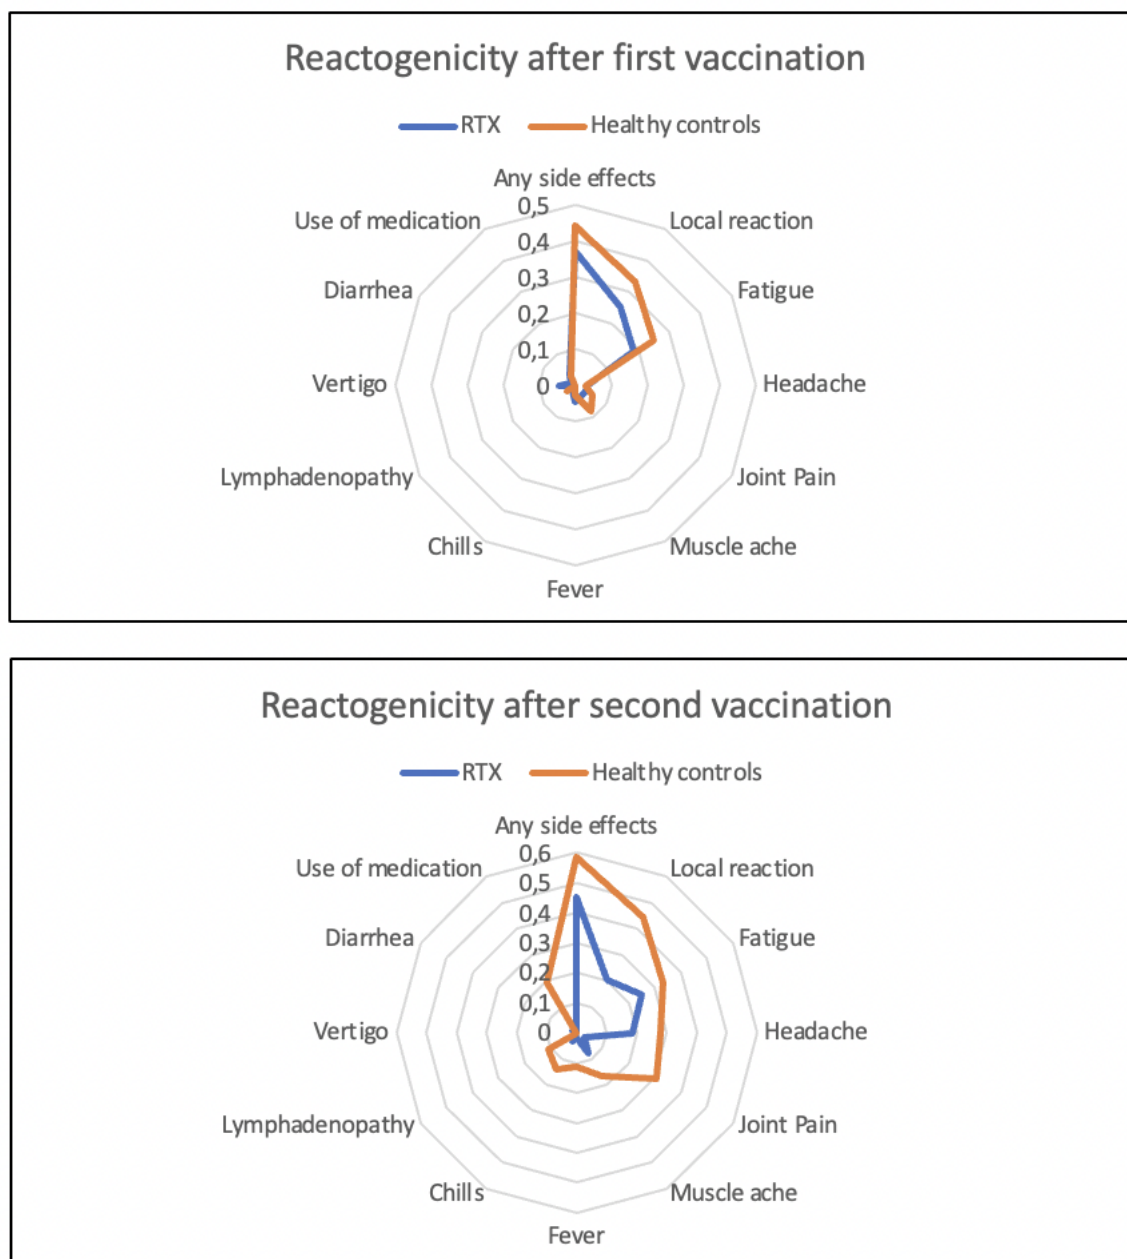

Supplemental Figure S4. Subgrouping of patients according to seroconversion of anti-S1 IgG, neutralizing antibodies, and anti-RBD antibodies.

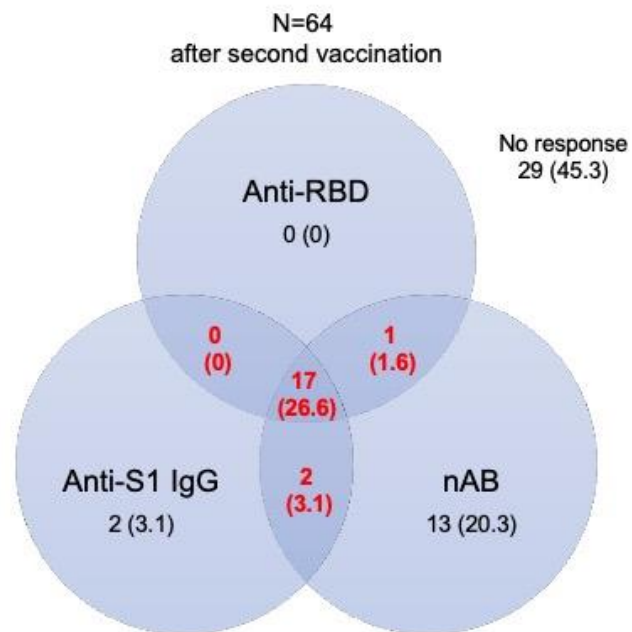

**Supplemental Figure S5.** CD4+ and CD19+ cell proportion of CD3+ lymphocytes, and correlation of CD4+ and CD19+ cells with anti-S1 IgG, neutralizing antibodies, and anti-RBD antibodies and neutralizing antibody activity against B.1.617.2 (delta).

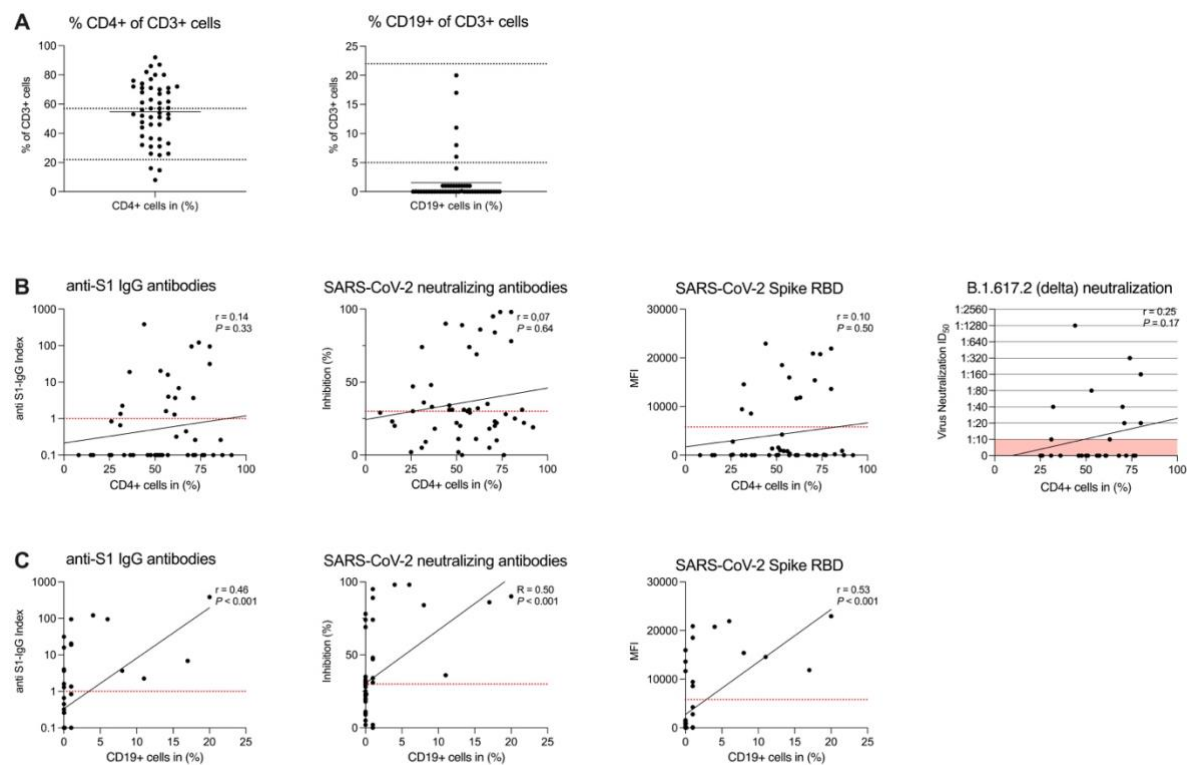

**Supplemental Figure S6.** Disease-specific humoral response and B-cell recovery depending on the last RTX treatment prior to the first anti-SARS-CoV-2 vaccination.

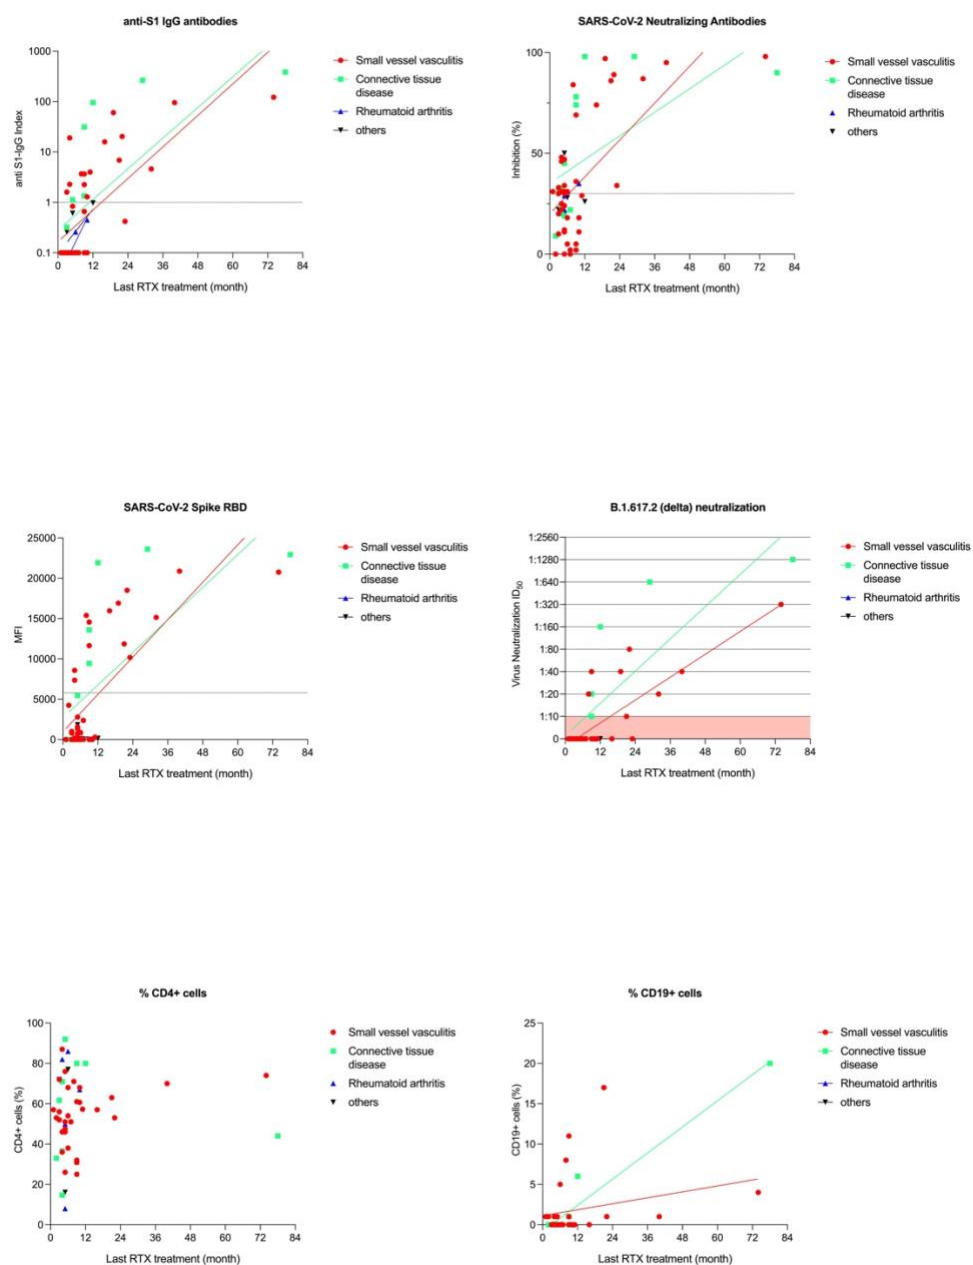

**Supplemental Figure S7.** Tretamnet-specific humoral response and B-cell recovery depending on the last RTX treatment prior to the first anti-SARS-CoV-2 vaccination.

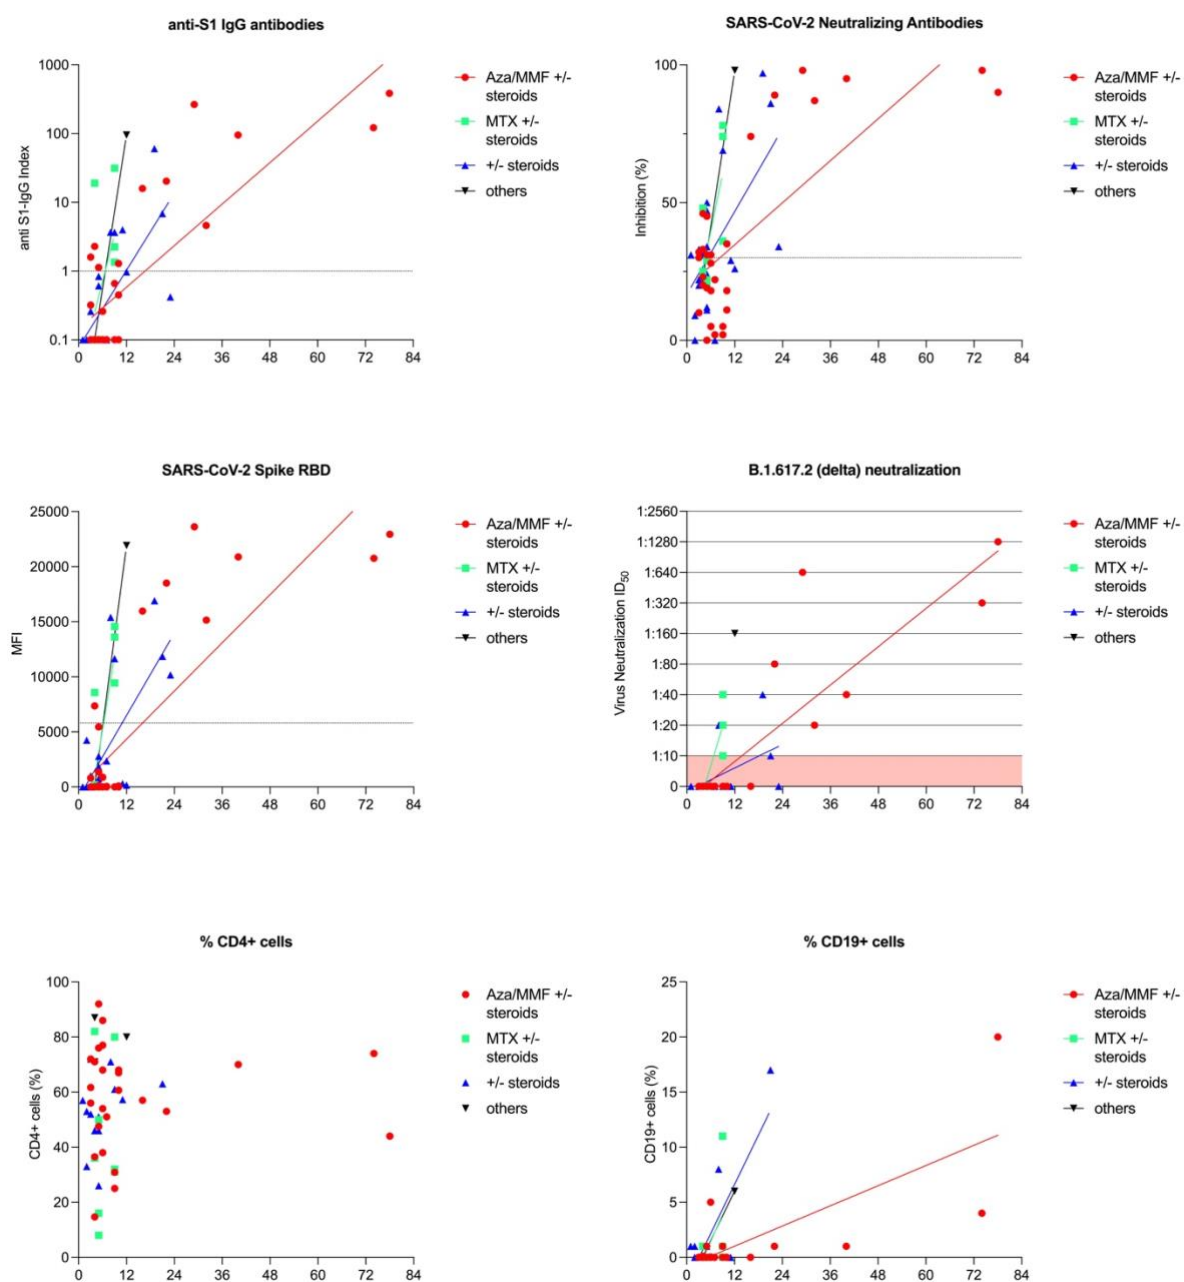

Supplement: s1 [file s1]
